# Supplementary material for: Comparative genomics of non-pseudomonal bacterial species colonising paediatric cystic fibrosis patients
Source: PeerJ journal article supplement (doi:10.7717/peerj.1223), 2015-09-15

0 5,000 10,000 20,000 25,000

**pSAS1**

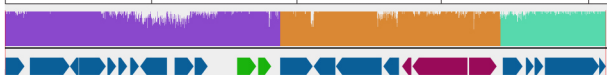

pA1-1

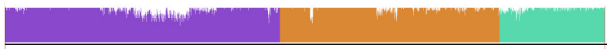

pA3

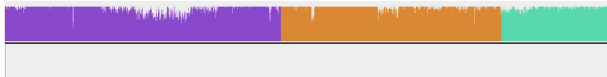

pA4

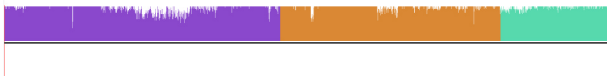

pA5

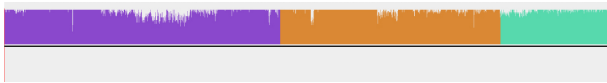

pC9

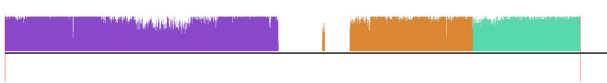

pB6

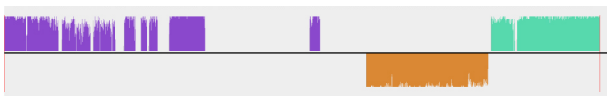

Supplement: Supplemental_Figure_S1_Saureus_plasmid.pdf [file Supplemental_Figure_S1_Saureus_plasmid.pdf]
