# Supplementary material for: Comparative genomics of non-pseudomonal bacterial species colonising paediatric cystic fibrosis patients
Source: PeerJ. 2015 Sep 15;3:e1223. doi: 10.7717/peerj.1223 (PMC4579023; doi:10.7717/peerj.1223)
Supplement: Table S1 [file peerj-03-1223-s001.xlsx]

## Sheet: Sheet1
	Date collected	Sample source	Sequenced isolate	Species cultured	CFU/ml
Patient A	2004-05-20	BAL	A1	Staphylococcus aureus	9000
	2004-05-20	BAL		Pseudomonas aeruginosa (non mucoid)	350000
	2004-05-20	BAL	A2	Stenotrophomonas maltophilia	400000
	2004-05-20	BAL		Streptococcus (alpha haemolytic)	400000
	2004-05-20	BAL		Corynebacterium	1200000
	2004-10-21	Sputum	A3	S. aureus	Sputum
	2005-03-22	BAL		Aspergillus fumigatus	200
	2005-03-22	BAL	A4	S. aureus	28000
	2005-03-22	BAL		P. aeruginosa	3800000
	2005-10-20	BAL		A. fumigatus	300
	2005-10-20	BAL	A5	S. aureus	60000
	2005-10-20	BAL		Staphylococcus (coagulase negative)	60000
	2005-10-20	BAL		Achromobacter xylosoxidans	80000
	2005-10-20	BAL		Corynebacterium	800000
	2005-10-20	BAL		Streptococcus (non haemolytic)	1300000
	2006-08-10	BAL		A. fumigatus	700
	2006-08-10	BAL	A7	A. xylosoxidans	200000
	2006-08-10	BAL		Streptococcus (alpha haemolytic)	200000
	2006-08-10	BAL		Neisseria	400000
	2010-02-21	Sputum	A8	A. xylosoxidans	Sputum
	2011-03-14	Sputum	A9	A. xylosoxidans	Sputum
	2011-05-30	Sputum	A10	A. xylosoxidans	Sputum
	2011-08-05	Sputum	A11	A. xylosoxidans	Sputum
	2011-08-18	Sputum	A12	A. xylosoxidans	Sputum
	2011-09-05	Sputum	A13	A. xylosoxidans	Sputum
Patient B	2004-07-01	BAL		P. aeruginosa (non mucoid)	200
	2004-07-01	BAL	B1	S. maltophilia	3900
	2005-04-07	BAL	B2	Enterobacter cloacae	200
	2005-04-07	BAL		A. fumigatus	1000
	2005-04-07	BAL		Staphylococcus (coagulase negative)	30000
	2005-04-07	BAL		Streptococcus (alpha haemolytic)	300000
	2005-08-25	BAL	B3	E. cloacae	300
	2005-08-25	BAL		Streptococcus (alpha haemolytic)	20000
	2005-08-25	BAL	B4	S. maltophilia	50000
	2005-08-25	BAL		A. fumigatus	70000
	2005-11-28	BAL	B5	S. maltophilia	9000000
	2006-04-27	BAL		Pseudomonas (other species)	1000
	2006-04-27	BAL	B6	S. aureus	10000
	2006-04-27	BAL		Neisseria	90000
	2006-04-27	BAL		Streptococcus (non haemolytic)	90000
	2006-04-27	BAL		Streptococcus (alpha haemolytic)	200000
Patient C	2003-03-03	Sputum	C2	Pseudomonas stutzeri	Sputum
	2003-03-03	Sputum		Candida albicans	Sputum
	2003-03-11	BAL	C1	Haemophilus sp.	2500000
	2003-08-20	BAL	C7	Enterobacter asburiae	1000
	2003-08-20	BAL	C8	Escherichia coli	3000
	2003-08-20	BAL		Staphylococcus (other species)	200000
	2003-08-20	BAL		Haemophilus influenzae	1000000
	2003-08-20	BAL		Streptococcus (alpha haemolytic)	1000000
	2003-08-20	BAL		Neisseria	4000000
	2003-11-17	Sputum		C. albicans	Sputum
	2003-11-17	Sputum	C3	Enterobacter gergoviae	Sputum
	2003-11-20	BAL		A. fumigatus	300
	2003-11-20	BAL		Streptococcus (alpha haemolytic)	2000000
	2003-11-20	BAL		Neisseria	3000000
	2003-11-20	BAL		H. influenzae	5000000
	2006-04-27	BAL	C11	S. maltophilia	40000
	2006-04-27	BAL		Burkholderia cenocepacia	80000
	2006-04-27	BAL	C9	S. aureus	3000000
	2006-04-27	BAL		Streptococcus (non haemolytic)	5000000
	2006-04-27	BAL		Streptococcus (alpha haemolytic)	5000000
	2006-04-27	BAL	C10	H. influenzae	6000000
	2006-04-27	BAL		Neisseria	6000000
	2006-09-07	BAL		Neisseria	380000
	2006-09-07	BAL		Streptococcus (alpha haemolytic)	560000
	2006-09-07	BAL		Staphylococcus (coagulase negative)	560000
	2006-09-07	BAL		Streptococcus (non haemolytic)	620000
	2006-09-07	BAL		H. influenzae	800000
	2013-03-06	Sputum	C14	B. cenocepacia	Sputum
	2013-03-07	Sputum	C15	Acinetobacter sp.	Sputum
