# Supplementary material for: Comparative genomics of non-pseudomonal bacterial species colonising paediatric cystic fibrosis patients
Source: PeerJ. 2015 Sep 15;3:e1223. doi: 10.7717/peerj.1223 (PMC4579023; doi:10.7717/peerj.1223)
Supplement: Table S4 [file peerj-03-1223-s004.xlsx]

## Sheet: Patient A
	Drug Name	Start Date	Date End	Frequency	Route
Patient A	Ceftazidime	2002-01-17	2002-01-29	TDS	IV
	Dicloxacillin	2002-01-17	2002-01-21	QID	Oral
	Tobramycin	2002-01-19	2002-01-23	OD	IV
	Nystatin (Mycostatin)	2002-01-21	2002-01-30	QID	Other
	Tobramycin	2002-01-24	2002-01-29	OD	IV
	Ciprofloxacin (Ciproxin)	2002-01-30	2002-02-28	BD	Oral
	TOBI Neb	2002-01-30	2002-03-28	BD	Inhaled
	Augmentin Duo (Clavulin Duo) (Clamoxyl Duo)	2002-08-23	2002-09-07	BD	Oral
	Augmentin Duo (Clavulin Duo) (Clamoxyl Duo)	2002-09-13	2002-09-27	BD	Oral
	Augmentin Duo (Clavulin Duo) (Clamoxyl Duo)	2002-10-17	2002-10-31	BD	Oral
	Augmentin Duo (Clavulin Duo) (Clamoxyl Duo)	2002-12-08	2002-12-22	BD	Oral
	Augmentin Duo (Clavulin Duo) (Clamoxyl Duo)	2003-02-20	2003-03-10	BD	Oral
	Augmentin Duo (Clavulin Duo) (Clamoxyl Duo)	2003-04-05	2003-05-02	BD	Oral
	Augmentin Duo (Clavulin Duo) (Clamoxyl Duo)	2003-05-23	2003-06-13	BD	Oral
	Augmentin Duo (Clavulin Duo) (Clamoxyl Duo)	2003-07-15	2003-08-19	BD	Oral
	Augmentin Duo (Clavulin Duo) (Clamoxyl Duo)	2003-09-25	2003-10-09	BD	Oral
	Roxithromycin (Rulide)	2004-04-27	2004-05-19	N/K	Oral
	Ticarcillin sodium potassium clavulanate (Timentin)	2004-05-20	2004-06-02	TDS	IV
	Tobramycin	2004-05-20	2004-05-25	OD	IV
	Sample: A1	2004-05-20
	Sample: A2	2004-05-20
	Tobramycin	2004-05-26	2004-05-26	OD	IV
	Cotrimoxazole (Bactrim) (Resprim)	2004-05-27	2004-06-02	BD	Oral
	Tobramycin	2004-05-28	2004-06-02	OD	IV
	Ciprofloxacin (Ciproxin)	2004-06-03	2004-07-03	BD	Oral
	TOBI Neb	2004-06-03	2004-07-31	BD	Inhaled
	Cotrimoxazole (Bactrim) (Resprim)	2004-06-03	2004-08-11	BD	Oral
	Ticarcillin sodium potassium clavulanate (Timentin)	2004-08-12	2004-08-21	TDS	IV
	Tobramycin	2004-08-13	2004-08-14	OD	IV
	Tobramycin	2004-08-15	2004-08-21	OD	IV
	Itraconazole	2004-08-17	2004-08-20	BD	Oral
	Itraconazole	2004-08-21	2005-03-18	OD	Oral
	Augmentin Duo (Clavulin Duo) (Clamoxyl Duo)	2004-10-20	2004-12-01	BD	Oral
	Sample: A3	2004-10-21
	Roxithromycin (Rulide)	2005-03-14	2005-03-18	BD	Oral
	Ticarcillin sodium potassium clavulanate (Timentin)	2005-03-19	2005-03-31	TDS	IV
	Tobramycin	2005-03-19	2005-03-21	OD	IV
	Itraconazole	2005-03-19	2005-03-22	OD	Oral
	Tobramycin	2005-03-22	2005-03-24	OD	IV
	Sample: A4	2005-03-22
	Itraconazole	2005-03-24	2005-03-31	OD	Oral
	Tobramycin	2005-03-25	2005-03-31	OD	IV
	Flucloxacillin (Fluclox)	2005-04-01	2005-04-15	TDS	Oral
	Ciprofloxacin (Ciproxin)	2005-04-01	2005-05-01	BD	Oral
	TOBI Neb	2005-04-01	2005-06-01	BD	Inhaled
	Itraconazole	2005-04-01	2005-07-06	OD	Oral
	Flucloxacillin (Fluclox)	2005-07-04	2005-07-07	QID	Oral
	Cotrimoxazole (Bactrim) (Resprim)	2005-07-04	2005-07-07	BD	Oral
	Ceftazidime	2005-07-07	2005-07-20	TDS	IV
	Tobramycin	2005-07-08	2005-07-20	OD	IV
	Itraconazole	2005-07-09	2005-07-20	OD	Oral
	Ciprofloxacin (Ciproxin)	2005-07-21	2005-08-21	BD	Oral
	TOBI Neb	2005-07-21	2005-09-18	BD	Inhaled
	Sample: A5	2005-10-20
	Tobramycin	2005-10-21	2005-10-24	OD	IV
	Itraconazole	2005-10-21	2005-10-24	OD	Oral
	Roxithromycin (Rulide)	2005-10-24	2005-11-10	BD	Oral
	Ticarcillin sodium potassium clavulanate (Timentin)	2005-11-11	2005-11-23	TDS	IV
	Tobramycin	2005-11-11	2005-11-23	OD	IV
	Flucloxacillin (Fluclox)	2005-11-30	2005-12-07	QID	Oral
	Flucloxacillin (Fluclox)	2006-03-15	2006-03-30	TDS	Oral
	Ceftazidime	2006-03-31	2006-04-07	TDS	IV
	Tobramycin	2006-03-31	2006-03-31	OD	IV
	Itraconazole	2006-03-31	2006-08-10	OD	Oral
	Tobramycin	2006-04-01	2006-04-01	OD	IV
	Tobramycin	2006-04-05	2006-04-07	OD	IV
	Ceftazidime	2006-04-07	2006-04-13	TDS	IV
	Tobramycin	2006-04-07	2006-04-13	OD	IV
	Ciprofloxacin (Ciproxin)	2006-04-13	2006-05-13	BD	Oral
	TOBI Neb	2006-04-13	2006-06-17	BD	Inhaled
	Augmentin Duo (Clavulin Duo) (Clamoxyl Duo)	2006-06-19	2006-06-26	TDS	Oral
	Augmentin Duo (Clavulin Duo) (Clamoxyl Duo)	2006-07-03	2006-07-17	TDS	Oral
	Ceftazidime	2006-08-10	2006-08-14	TDS	IV
	Itraconazole	2006-08-10	2006-08-23	OD	Oral
	Sample: A7	2006-08-10
	Tobramycin	2006-08-11	2006-08-14	OD	IV
	Ticarcillin sodium potassium clavulanate (Timentin)	2006-08-14	2006-08-23	TDS	IV
	Tobramycin	2006-08-15	2006-08-15	OD	IV
	Cotrimoxazole (Bactrim) (Resprim)	2006-08-23	2006-09-23	BD	Oral
	Dornase Alfa (Pulmozyme)	2006-08-10	2006-09-09	OD	Inhaled
	Itraconazole	2006-08-10	2006-08-19	OD	Oral
	Tobramycin	2006-08-10	2006-08-14	OD	IV
	Ceftazidime	2006-08-10	2006-08-13	TDS	IV
	Ticarcillin sodium potassium clavulanate (Timentin)	2006-08-14	2006-08-19	TDS	IV
	Cotrimoxazole (Bactrim) (Resprim)	2006-08-23	2006-09-13	BD	Oral
	Itraconazole	2006-11-30	2006-12-25	OD	Oral
	Itraconazole	2008-01-10	2008-02-09	BD	Oral
	Tobramycin	2008-01-10	2008-02-09	BD	Oral
	Ciprofloxacin (Ciproxin)	2008-01-11	2008-02-08	BD	Oral
	Ticarcillin sodium potassium clavulanate (Timentin)	2008-01-16	2008-01-22	TDS	IV
	Tobramycin	2008-01-17	2008-01-22	OD	IV
	Itraconazole	2008-01-17	2008-01-26	BD	Oral
	Ticarcillin sodium potassium clavulanate (Timentin)	2008-01-22	2008-01-28	TDS	IV
	Cetirizine hydrochloride (Zyrtec)	2008-01-22	2008-01-22	Stat	Oral
	Tobramycin	2008-01-22	2008-01-28	OD	IV
	Colistin	2008-02-07	2008-06-06	BD	Inhaled
	Itraconazole	2008-03-07	2008-03-21	BD	Oral
	Azithromycin	2008-03-07	2008-03-08	M/W/F	Oral
	Itraconazole	2008-03-10	2008-03-13	BD	Oral
	Cefoxitin	2008-03-26	2008-04-17	QID	IV
	Amikacin	2008-03-28	2008-03-28	OD	IV
	Amikacin	2008-03-26	2008-03-27	TDS	IV
	Amikacin	2008-04-01	2008-04-17	OD	IV
	Ticarcillin sodium potassium clavulanate (Timentin)	2008-05-30	2008-06-11	TDS	IV
	Tobramycin	2008-05-30	2008-06-02	OD	IV
	Tobramycin	2008-06-03	2008-06-11	OD	IV
	Itraconazole	2008-06-03	2008-06-13	BD	Oral
	Itraconazole	2008-06-10	2008-06-20	BD	Oral
	Tobramycin	2008-09-21	2008-10-03	OD	IV
	Ticarcillin sodium potassium clavulanate (Timentin)	2008-09-21	2008-10-03	TDS	IV
	Voriconazole (Vfend)	2008-09-29	2008-11-01	BD	Oral
	Colistin	2008-10-03	2008-11-02	BD	Inhaled
	Azithromycin	2009-03-27	2009-04-16	OD	Oral
	Voriconazole (Vfend)	2009-03-27	2009-04-16	BD	Oral
	Amikacin	2009-03-27	2009-03-31	OD	Inhaled
	Azithromycin	2009-04-17	2009-05-16	M/W/F	Oral
	Amikacin	2009-04-17	2009-05-16	BD	Inhaled
	Voriconazole (Vfend)	2009-04-17	2009-05-14	BD	Oral
	Colistin	2009-04-17	2009-05-16	BD	Inhaled
	Colistin	2009-07-30	2009-08-29	BD	Inhaled
	Voriconazole (Vfend)	2009-07-30	2009-08-26	BD	Oral
	Ticarcillin sodium potassium clavulanate (Timentin)	2009-09-03	2009-09-13	TDS	IV
	Tobramycin	2009-09-03	2009-09-11	OD	IV
	Voriconazole (Vfend)	2009-09-04	2009-10-12	BD	Oral
	Amikacin	2009-09-11	2009-10-10	BD	Inhaled
	Cotrimoxazole (Bactrim) (Resprim)	2009-09-11	2009-09-24	BD	Oral
	Tobramycin	2009-09-12	2009-09-13	OD	IV
	Cotrimoxazole (Bactrim) (Resprim)	2009-12-01	2009-12-14	BD	Oral
	Amikacin	2009-12-01	2009-12-30	BD	Inhaled
	Colistin	2009-12-01	2009-12-30	BD	Inhaled
	Sample: COBR8	2010-02-21
	Timentin	2010-04-06	2010-04-16	TDS	IV
	Tobramycin	2010-04-06	2010-04-08	OD	IV
	Colistin	2010-04-07	2010-05-06	BD	Inhaled
	Cotrimoxazole (Bactrim) (Resprim)	2010-04-07	2010-04-20	BD	Oral
	Tobramycin	2010-04-09	2010-04-16	OD	IV
	Cotrimoxazole (Bactrim) (Resprim)	2010-10-25	2010-11-07	BD	Oral
	Colistin	2010-10-25	2010-11-23	BD	Inhaled
	Voriconazole (Vfend)	2010-10-25	2010-11-21	TDS	Oral
	Colistin	2011-01-05	2011-01-13	TDS	IV
	Meropenem	2011-01-05	2011-01-13	TDS	IV
	Voriconazole (Vfend)	2011-01-05	2011-01-18	BD	Oral
	Sample: COBR9	2011-03-14
	Ceftazidime	2011-03-15	2011-03-28	TDS	IV
	Colistin	2011-03-15	2011-03-28	TDS	IV
	Itraconazole	2011-03-19	2011-06-01	OD	Oral
	Cotrimoxazole (Bactrim) (Resprim)	2011-03-28	2011-04-26	BD	Oral
	Tobramycin	2011-03-28	2011-04-26	BD	Inhaled
	Sample: COBR10	2011-05-30
	Sample: COBR11	2011-08-05
	Sample: COBR12	2011-08-18
	Sample: COBR13	2011-09-05
	Ceftazidime	2011-09-09	2011-09-17	TDS	IV
	Colistin	2011-09-09	2011-09-17	TDS	IV
	Itraconazole	2011-09-10	2011-11-14	BD	Oral
	Cotrimoxazole (Bactrim) (Resprim)	2011-09-16	2011-10-14	BD	Oral

## Sheet: Patient B
	Drug Name	Start Date	Date End	Frequency	Route
Patient B	Amoxycillin trihydrate;potassium clavulanate (Augmentin)	2001-08-16	2001-08-31	TDS	Oral
	Amoxycillin trihydrate;potassium clavulanate (Augmentin)	2001-10-05	2001-10-18	TDS	Oral
	Amoxycillin trihydrate;potassium clavulanate (Augmentin)	2001-11-22	2001-12-02	TDS	Oral
	Amoxycillin trihydrate;potassium clavulanate (Augmentin)	2002-01-03	2002-01-28	TDS	Oral
	Amoxycillin trihydrate;potassium clavulanate (Augmentin)	2002-03-23	2002-04-03	TDS	Oral
	Amoxycillin trihydrate;potassium clavulanate (Augmentin)	2002-04-22	2002-04-27	TDS	Oral
	Augmentin Duo (Clavulin Duo) (Clamoxyl Duo)	2002-04-28	2002-05-05	BD	Oral
	Augmentin Duo (Clavulin Duo) (Clamoxyl Duo)	2002-05-19	2002-06-02	BD	Oral
	Augmentin Duo (Clavulin Duo) (Clamoxyl Duo)	2002-08-20	2002-09-03	BD	Oral
	Augmentin Duo (Clavulin Duo) (Clamoxyl Duo)	2002-09-16	2002-09-29	BD	Oral
	Augmentin Duo (Clavulin Duo) (Clamoxyl Duo)	2003-03-17	2003-03-24	BD	Oral
	Augmentin Duo (Clavulin Duo) (Clamoxyl Duo)	2003-05-09	2003-05-25	BD	Oral
	Augmentin Duo (Clavulin Duo) (Clamoxyl Duo)	2003-06-05	2003-06-18	BD	Oral
	Augmentin Duo (Clavulin Duo) (Clamoxyl Duo)	2003-06-21	2003-06-28	BD	Oral
	Augmentin Duo (Clavulin Duo) (Clamoxyl Duo)	2003-07-07	2003-07-13	BD	Oral
	Augmentin Duo (Clavulin Duo) (Clamoxyl Duo)	2003-07-16	2003-09-02	BD	Oral
	Amoxycillin trihydrate;potassium clavulanate (Augmentin)	2003-09-08	2003-09-11	BD	Oral
	Cefaclor monohydrate (Ceclor)	2003-11-14	2003-11-16	BD	Oral
	Augmentin Duo (Clavulin Duo) (Clamoxyl Duo)	2003-12-18	2003-12-25	BD	Oral
	Augmentin Duo (Clavulin Duo) (Clamoxyl Duo)	2003-12-29	2004-01-11	BD	Oral
	Cefaclor monohydrate (Ceclor)	2004-01-20	2004-01-29	BD	Oral
	Augmentin Duo (Clavulin Duo) (Clamoxyl Duo)	2004-02-13	2004-02-18	BD	Oral
	Augmentin Duo (Clavulin Duo) (Clamoxyl Duo)	2004-02-20	2004-02-26	BD	Oral
	Augmentin Duo (Clavulin Duo) (Clamoxyl Duo)	2004-03-12	2004-03-26	BD	Oral
	Augmentin Duo (Clavulin Duo) (Clamoxyl Duo)	2004-03-29	2004-04-05	BD	Oral
	Augmentin Duo (Clavulin Duo) (Clamoxyl Duo)	2004-05-09	2004-05-15	BD	Oral
	Augmentin Duo (Clavulin Duo) (Clamoxyl Duo)	2004-05-18	2004-05-24	BD	Oral
	Augmentin Duo (Clavulin Duo) (Clamoxyl Duo)	2004-06-06	2004-06-19	BD	Oral
	Augmentin Duo (Clavulin Duo) (Clamoxyl Duo)	2004-06-25	2004-06-30	BD	Oral
	Ticarcillin sodium potassium clavulanate (Timentin)	2004-07-01	2004-07-15	TDS	IV
	Sample: B1	2004-07-01
	Tobramycin	2004-07-02	2004-07-09	OD	IV
	Cotrimoxazole (Bactrim) (Resprim)	2004-07-03	2004-07-14	BD	Oral
	Tobramycin	2004-07-10	2004-07-14	OD	IV
	Ciprofloxacin (Ciproxin)	2004-07-15	2004-08-15	BD	Oral
	TOBI Neb	2004-07-15	2004-09-08	BD	Inhaled
	Cotrimoxazole (Bactrim) (Resprim)	2004-07-15	2004-08-15	BD	Oral
	Augmentin Duo (Clavulin Duo) (Clamoxyl Duo)	2005-03-11	2005-03-18	BD	Oral
	Augmentin Duo (Clavulin Duo) (Clamoxyl Duo)	2005-03-22	2005-04-04	BD	Oral
	Ceftazidime	2005-04-07	2005-04-22	TDS	IV
	Tobramycin	2005-04-07	2005-04-08	OD	IV
	Sample: B2	2005-04-07
	Tobramycin	2005-04-09	2005-04-22	OD	IV
	Itraconazole	2005-04-11	2005-04-13	OD	Oral
	Itraconazole	2005-04-14	2005-04-23	OD	Oral
	Cotrimoxazole (Bactrim) (Resprim)	2005-04-23	2005-04-23	BD	Oral
	Cotrimoxazole (Bactrim) (Resprim)	2005-04-25	2005-05-25	BD	Oral
	Itraconazole	2005-04-25	2005-06-20	OD	Oral
	Cotrimoxazole (Bactrim) (Resprim)	2005-05-31	2005-06-10	BD	Oral
	Cotrimoxazole (Bactrim) (Resprim)	2005-06-26	2005-07-12	BD	Oral
	Augmentin Duo (Clavulin Duo) (Clamoxyl Duo)	2005-07-13	2005-08-24	BD	Oral
	Sample: B3	2005-08-25
	Sample: B4	2005-08-25
	Ceftazidime	2005-08-26	2005-09-04	TDS	IV
	Tobramycin	2005-08-26	2005-08-26	OD	IV
	Tobramycin	2005-08-27	2005-09-01	OD	IV
	Cotrimoxazole (Bactrim) (Resprim)	2005-08-31	2005-09-05	BD	Oral
	Itraconazole	2005-08-31	2005-09-05	OD	Oral
	Cotrimoxazole (Bactrim) (Resprim)	2005-09-05	2005-10-05	BD	Oral
	Itraconazole	2005-09-05	2005-09-14	OD	Oral
	Itraconazole	2005-09-14	2005-10-21	BD	Oral
	Augmentin Duo (Clavulin Duo) (Clamoxyl Duo)	2005-11-10	2005-11-27	BD	Oral
	Sample: B5	2005-11-28
	Ceftazidime	2005-11-29	2005-12-01	TDS	IV
	Tobramycin	2005-11-29	2005-12-01	OD	IV
	Cotrimoxazole (Bactrim) (Resprim)	2005-12-01	2006-01-31	BD	Oral
	Cotrimoxazole (Bactrim) (Resprim)	2006-02-18	2006-04-27	BD	Oral
	Ceftazidime	2006-04-27	2006-05-11	TDS	IV
	Sample: B6	2006-04-27
	Tobramycin	2006-04-28	2006-04-28	OD	IV
	Tobramycin	2006-04-29	2006-05-10	OD	IV
	Dicloxacillin	2006-05-02	2006-05-05	QID	Oral
	Ciprofloxacin (Ciproxin)	2006-05-11	2006-07-11	BD	Oral
	TOBI Neb	2006-05-11	2006-07-11	BD	Inhaled
	Cotrimoxazole (Bactrim) (Resprim)	2006-07-11	2006-08-11	BD	Oral

## Sheet: Patient C
	Drug Name	Start Date	Date End	Frequency	Route
Patient C	Augmentin Duo (Clavulin Duo) (Clamoxyl Duo)	2001-07-22	2001-08-09	BD	Oral
	Augmentin Duo (Clavulin Duo) (Clamoxyl Duo)	2001-10-30	2001-12-11	BD	Oral
	Augmentin Duo (Clavulin Duo) (Clamoxyl Duo)	2002-05-02	2002-05-11	BD	Oral
	Augmentin Duo (Clavulin Duo) (Clamoxyl Duo)	2002-06-13	2002-06-18	BD	Oral
	Augmentin Duo (Clavulin Duo) (Clamoxyl Duo)	2002-06-19	2002-08-04	BD	Oral
	Ticarcillin sodium potassium clavulanate (Timentin)	2002-06-20	2002-06-28	TDS	IV
	Tobramycin	2002-06-21	2002-06-24	OD	IV
	Tobramycin	2002-06-25	2002-06-26	OD	IV
	Tobramycin	2002-06-27	2002-06-28	OD	IV
	Itraconazole	2002-06-28	2002-09-18	OD	Oral
	Augmentin Duo (Clavulin Duo) (Clamoxyl Duo)	2002-09-04	2002-09-11	BD	Oral
	Augmentin Duo (Clavulin Duo) (Clamoxyl Duo)	2002-11-01	2002-11-20	BD	Oral
	Ticarcillin sodium potassium clavulanate (Timentin)	2002-11-21	2002-12-06	TDS	IV
	Tobramycin	2002-11-22	2002-12-05	OD	IV
	Ciprofloxacin (Ciproxin)	2002-12-06	2003-01-08	BD	Oral
	TOBI Neb	2002-12-06	2003-01-31	BD	Inhaled
	Augmentin Duo (Clavulin Duo) (Clamoxyl Duo)	2002-12-18	2003-01-01	BD	Oral
	Sample: C2	2003-03-03
	Augmentin Duo (Clavulin Duo) (Clamoxyl Duo)	2003-03-11	2003-03-24	BD	Oral
	Sample: C1	2003-03-11
	Augmentin Duo (Clavulin Duo) (Clamoxyl Duo)	2003-06-11	2003-06-30	BD	Oral
	Ticarcillin sodium potassium clavulanate (Timentin)	2003-08-20	2003-08-22	TDS	IV
	Sample: C7	2003-08-20
	Sample: C8	2003-08-20
	Tobramycin	2003-08-21	2003-08-22	OD	IV
	Augmentin Duo (Clavulin Duo) (Clamoxyl Duo)	2003-08-22	2003-08-29	BD	Oral
	Augmentin Duo (Clavulin Duo) (Clamoxyl Duo)	2003-09-05	2003-09-11	BD	Oral
	Augmentin Duo (Clavulin Duo) (Clamoxyl Duo)	2003-10-24	2003-11-19	BD	Oral
	Sample: C3	2003-11-17
	Ticarcillin sodium potassium clavulanate (Timentin)	2003-11-21	2003-11-30	TDS	IV
	Tobramycin	2003-11-22	2003-11-30	OD	IV
	Augmentin Duo (Clavulin Duo) (Clamoxyl Duo)	2003-11-30	2003-12-28	BD	Oral
	Augmentin Duo (Clavulin Duo) (Clamoxyl Duo)	2004-03-18	2004-03-18	BD	Oral
	Ticarcillin sodium potassium clavulanate (Timentin)	2004-03-20	2004-03-23	TDS	IV
	Tobramycin	2004-03-20	2004-03-23	OD	IV
	Roxithromycin (Rulide)	2004-03-23	2004-03-30	BD	Oral
	Roxithromycin (Rulide)	2004-05-01	2004-05-14	N/K	Oral
	Augmentin Duo (Clavulin Duo) (Clamoxyl Duo)	2004-10-28	2004-11-05	BD	Oral
	Augmentin Duo (Clavulin Duo) (Clamoxyl Duo)	2005-06-25	2005-07-08	BD	Oral
	Benzylpenicillin Sodium (Benpen)	2005-10-10	2005-10-11	QID	IV
	Augmentin Duo (Clavulin Duo) (Clamoxyl Duo)	2005-10-11	2005-10-18	BD	Oral
	Ticarcillin sodium potassium clavulanate (Timentin)	2005-10-19	2005-10-31	TDS	IV
	Tobramycin	2005-10-19	2005-10-21	OD	IV
	Tobramycin	2005-10-22	2005-10-24	OD	IV
	Tobramycin	2005-10-25	2005-10-31	OD	IV
	Augmentin Duo (Clavulin Duo) (Clamoxyl Duo)	2005-10-31	2005-11-13	BD	Oral
	Augmentin Duo (Clavulin Duo) (Clamoxyl Duo)	2006-02-13	2006-02-22	BD	Oral
	Augmentin Duo (Clavulin Duo) (Clamoxyl Duo)	2006-03-28	2006-04-11	BD	Oral
	Ceftazidime	2006-04-27	2006-04-28	TDS	IV
	Sample: C9	2006-04-27
	Sample: C10	2006-04-27
	Sample: C11	2006-04-27
	Ticarcillin sodium potassium clavulanate (Timentin)	2006-04-28	2006-05-12	TDS	IV
	Tobramycin	2006-04-28	2006-04-28	OD	IV
	Tobramycin	2006-04-29	2006-05-12	OD	IV
	Meropenem	2006-05-02	2006-05-12	TDS	IV
	Ciprofloxacin (Ciproxin)	2006-05-12	2006-06-12	BD	Oral
	TOBI Neb	2006-05-12	2006-07-12	BD	Inhaled
	Ciprofloxacin (Ciproxin)	2006-09-07	2006-09-28	BD	Oral
	Sample: C14	2013-03-06
	Sample: C15	2013-03-07
